# Supplementary material
Source: PubMed Central journal article supplement (PMC2638916)
Supplement: ern208_1.pdf [file ern208_1.pdf]

## Phospholipase A<sub>2</sub>β mediates light-induced stomatal opening in *Arabidopsis*

Jiyoung Seo, Hyoung Yool Lee, Hyunju Choi, Yunjung Choi, Yuree Lee, Yong-Woo Kim, Stephen Beungtae Ryu, and Youngsook Lee

### Supplementary Data

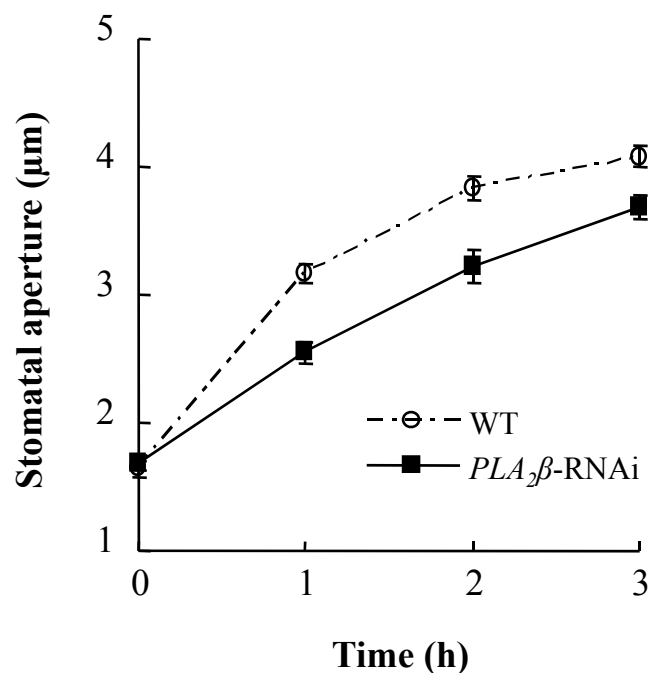

**Figure S1.** Stomatal opening of *PLA<sub>2</sub>β*-silenced and wild-type plants induced by 90 μmol m<sup>-2</sup> s<sup>-1</sup> white light.

Leaves were floated on a solution containing 10 mM KCl and 30 mM Mes-KOH (pH 6.1) while illuminated with white light (90 μmol m<sup>-2</sup> s<sup>-1</sup>) for 3 h. Note that *PLA<sub>2</sub>β* RNAi stomata open less than wild type stomata in response to light. Values represent the means ± standard error (SE) of n=120-146 stomata from three independent experiments.

## Supplementary Data

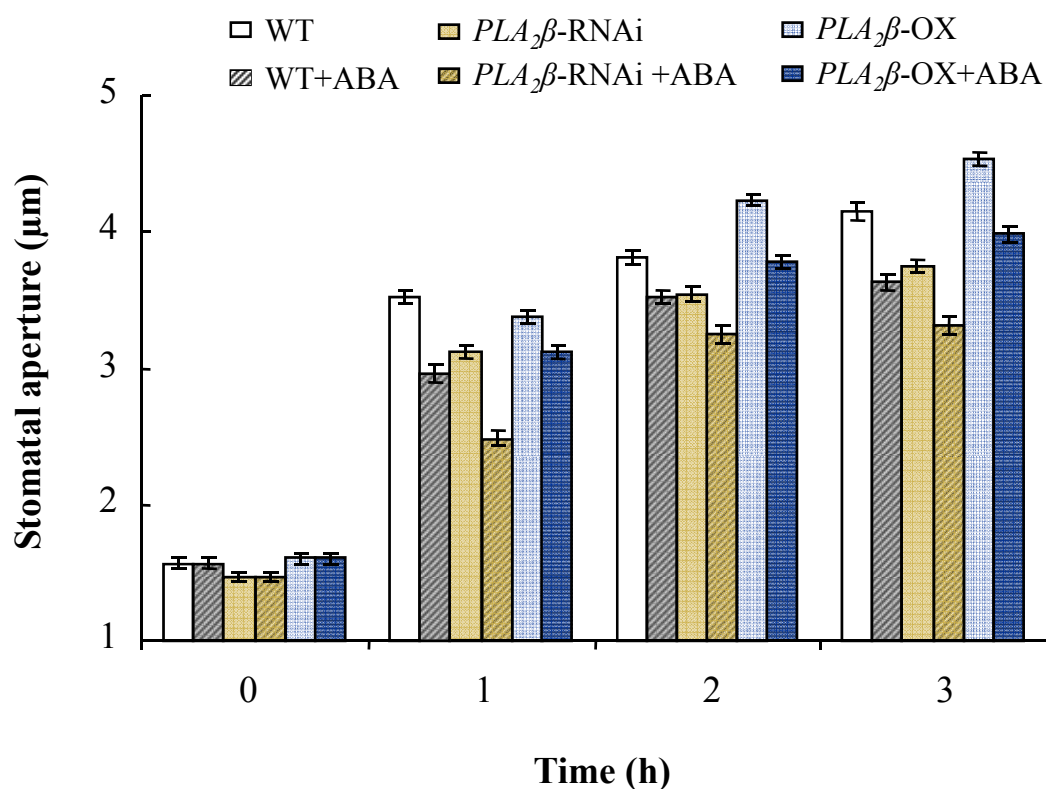

**Figure S2.** Effect of ABA on light-induced stomatal opening in wild-type and  $PLA_2\beta$  mutant plants.

Stomatal opening was measured before exposure to light, and then again at 1 h intervals after exposure to light in media supplemented with or without 1  $\mu$ M ABA. Values represent the means  $\pm$  SE of three independent experiments. n=130-192. Note that the difference in light-induced opening between  $PLA_2\beta$  mutant plants and the wild type plants is maintained even in the presence of ABA in the medium.
